# Supplementary material for: Oral administration of N-acetyl cysteine prevents osteoarthritis development and progression in a rat model
Source: PubMed Central journal article supplement (PMC6904562; doi:10.1038/s41598-019-55297-2), 2019-12-10

Oral administration of N-acetyl cysteine prevents osteoarthritis development and progression in a rat model

Yosuke Kaneko<sup>1</sup>, Nobuharu Tanigawa<sup>1</sup>, Yuiko Sato<sup>1,2</sup>, Tami Kobayashi<sup>1,3</sup>, Satoshi Nakamura<sup>1</sup>, Eri Ito<sup>4</sup>, Tomoya Soma<sup>5</sup>, Kana Miyamoto<sup>1</sup>, Shu Kobayashi<sup>1</sup>, Kengo Harato<sup>1</sup>, Morio Matsumoto<sup>1</sup>, Masaya Nakamura<sup>1</sup>, Yasuo Niki<sup>1,\*</sup> and Takeshi Miyamoto<sup>1,2,3,6,\*</sup>

<sup>1</sup>Department of Orthopedic Surgery, <sup>2</sup>Department of Advanced Therapy for Musculoskeletal Disorders II, <sup>3</sup>Department of Musculoskeletal Reconstruction and Regeneration Surgery, <sup>4</sup>Institute for Integrated Sports Medicine, <sup>5</sup>Division of Oral and Maxillofacial Surgery, Department of Dentistry and Oral Surgery, Keio University School of Medicine, 35 Shinano-machi, Shinjuku-ku, Tokyo 160-8582, Japan, <sup>6</sup>Department of Orthopedic Surgery, Kumamoto University, 1-1-1 Honjo, Chuo-ku, Kumamoto 860-8556, Japan

## **Supplementary Figure Legends.**

### **Figure S1. ROS accumulates in primary chondrocytes following mechanical stress.**

Primary chondrocytes isolated from articular cartilage of 5-week-old wild-type male

Wistar rats were cultured with or without cyclic loading stresses (40g weight, 2Hz) in

the presence or absence of NAC (10 $\mu$ M) for 45 or 60 minutes and then evaluated for

*TNF $\alpha$*  expression or *MMP-13*, respectively, by real-time PCR. Data represent mean

*TNF $\alpha$*  expression or *MMP-13* expression relative to  *$\beta$ -actin*  $\pm$  SD (n = 3 each, \*P<0.05).

Representative data of at least two independent experiments are shown.

### **Figure S2. ROS accumulates in the joints by two weeks after surgery.**

Osteoarthritis or sham surgery was performed in left and right knee joints, respectively,

in 12-week-old wild-type male Wistar rats, and they were maintained for two weeks

afterwards. Left osteoarthritis-operated knee joint sections (femur and tibia) and right

sham-operated knee joint sections (femur and tibia) were prepared and stained with mouse anti 8-OHdG followed by Alexa Fluor 488-conjugated goat anti-mouse IgG. Nuclei were visualized by DAPI. Bar, 20 $\mu$ m. Representative data of at least two independent experiments are shown. White dotted lines indicate joint surfaces of the tibia.

**Figure S3. Oral NAC administration does not alter water or food intake or body weight in Wistar rats. (a - d)** Osteoarthritis or sham surgery was performed in the left or right knee joints, respectively, in 12-week-old wild-type male Wistar rats, and rats were maintained with or without NAC water (5.0g/l) for four (**a**, **b** and **c**) or eight (**d**) weeks after surgery. Amounts of NAC or normal water or food eaten by rats per day were then measured (**a** and **b**). Data represent mean amount of water or food ingested by rats per day  $\pm$  SD (n=3 each, NS not significant). (**c** and **d**) Body weight evaluated at 0, 4 or 8 weeks after surgery in rats administered water with or without NAC. Data

represent mean body weight  $\pm$  SD (n=6 each, NS not significant).

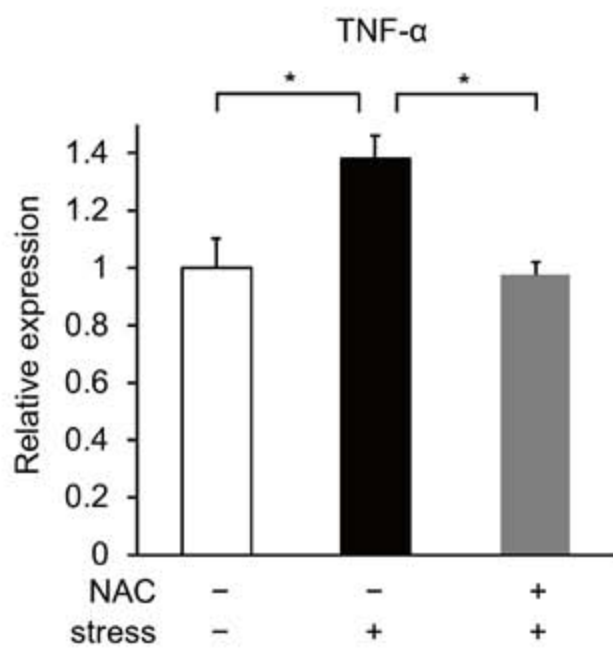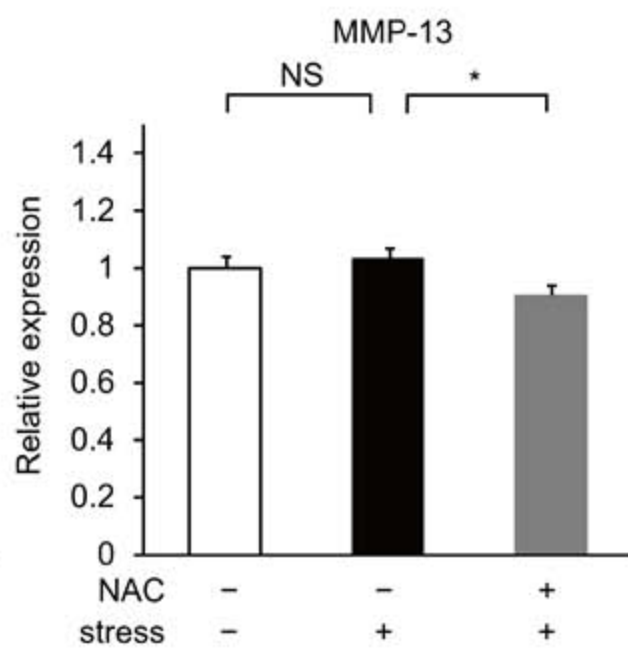

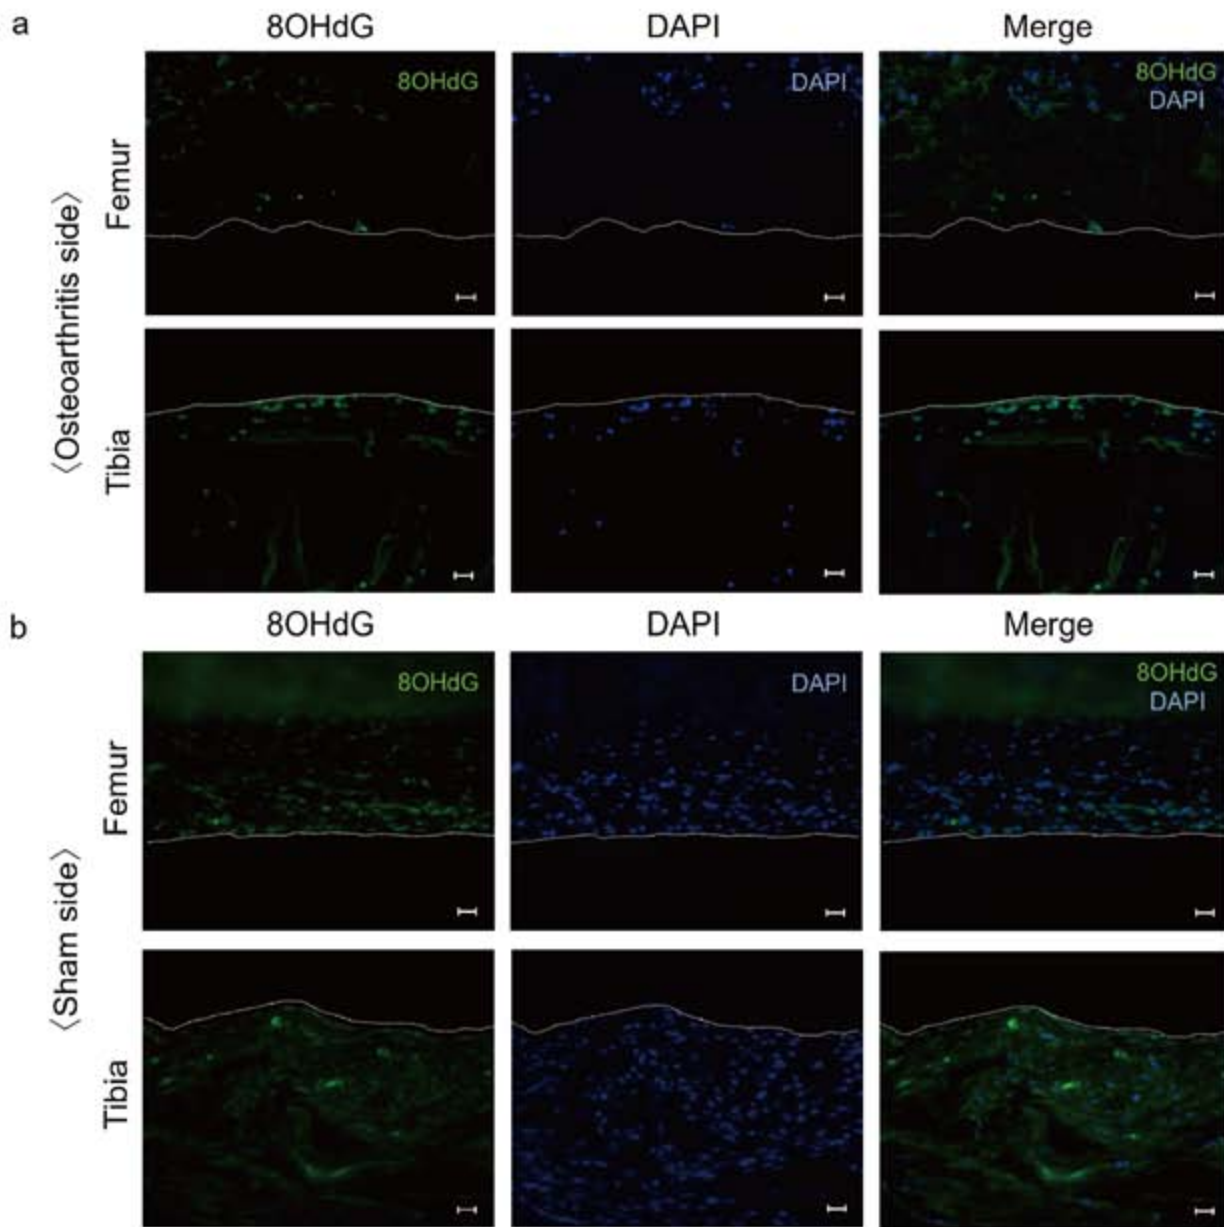

a

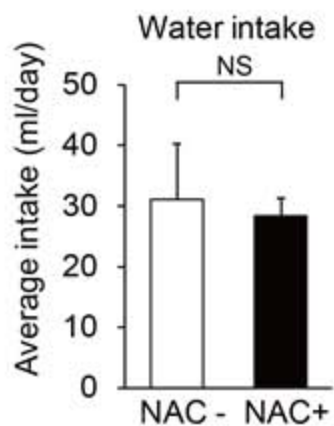

b

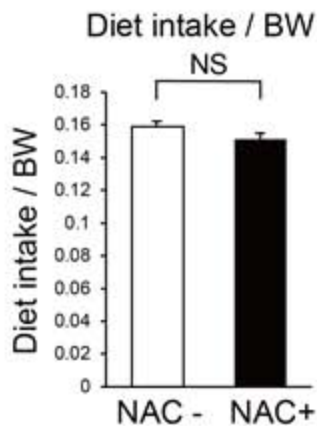

c

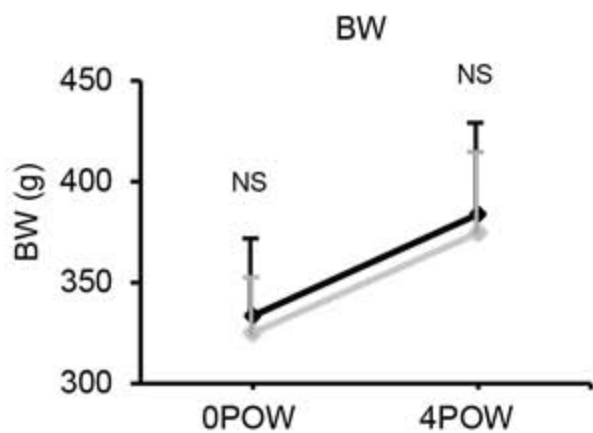

d

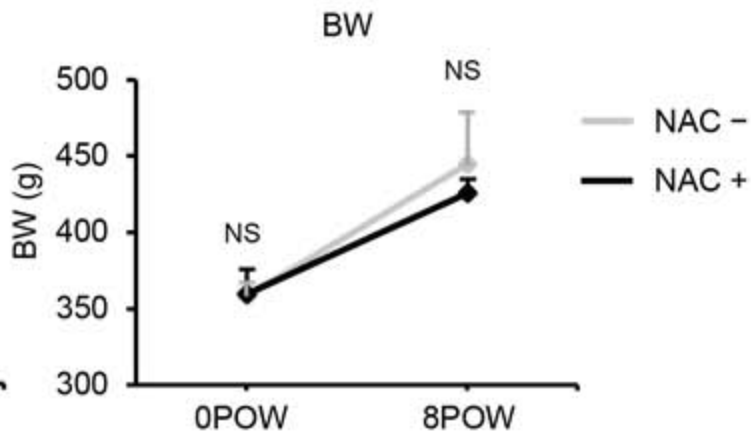

Supplement: 41598_2019_55297_MOESM1_ESM.pdf [file 41598_2019_55297_MOESM1_ESM.pdf]
